# Supplementary material for: Association Between the Extent of Resection and Prognosis in Adult Patients With WHO Grade III Gliomas: a Population-based Study
Source: Research Square preprint supplement (doi:10.21203/rs.3.rs-1138010/v1), 2021-12-08
Supplement: Supplementary file 1 [file 27b9c761c109685a310b9f95.docx]

Five-year and ten-year cumulative incidence estimates of death stratified by extent of resection.

| Extent of resection | 5-year | *P* value | 10-year | *P* value |
| --- | --- | --- | --- | --- |
| N-GTR | 51.9% | < 0.001a | 65.5% | < 0.001a |
| GTR | 36.6% |  | 49.9% |  |

a Statistical significance (p < 0.05).
